# Supplementary material for: The invasive red-eared slider turtle is more successful than the native Chinese three-keeled pond turtle: evidence from the gut microbiota
Source: PubMed Central journal article supplement (PMC7603792; doi:10.7717/peerj.10271), 2020-10-29
Supplement: peerj-08-10271-s001.pdf [file peerj-08-10271-s001.pdf]

Table S1 The number of operational taxonomic units (OTUs) and different bacterial taxonomic units of each sample for *Chinemys reevesii* (CR) and *Trachemys scripta elegans* (TSE).

| Samples | OTUs | Phylum | Class | Order | Family | Genus |
|---------|------|--------|-------|-------|--------|-------|
| CR_1    | 32   | 3      | 4     | 4     | 9      | 8     |
| CR_2    | 30   | 4      | 5     | 5     | 8      | 8     |
| CR_3    | 25   | 3      | 4     | 5     | 9      | 8     |
| TSE_1   | 29   | 3      | 4     | 4     | 8      | 8     |
| TSE_2   | 30   | 4      | 5     | 6     | 10     | 9     |
| TSE_3   | 40   | 4      | 5     | 5     | 9      | 10    |
| Total   | 50   | 5      | 7     | 7     | 17     | 28    |
