# Supplementary material for: The invasive red-eared slider turtle is more successful than the native Chinese three-keeled pond turtle: evidence from the gut microbiota
Source: PubMed Central journal article supplement (PMC7603792; doi:10.7717/peerj.10271), 2020-10-29
Supplement: peerj-08-10271-s002.pdf [file peerj-08-10271-s002.pdf]

Table S2 A summary of diversity indexes and results of Student's t tests.

| Diversity indexes | <i>Chinemys reevesii</i> | <i>Trachemys scripta elegans</i> | Student's t test                |
|-------------------|--------------------------|----------------------------------|---------------------------------|
| Ace               | 46.5862±1.8417           | 54.9056±3.3461                   | $t = 2.11, df = 4, P = 0.10$    |
| Shannon           | 2.3211±0.1785            | 2.3661±0.0251                    | $t = 0.25, df = 2.08, P = 0.83$ |
| Shannoneven       | 0.6091±0.0486            | 0.6093±0.0086                    | $t < 0.01, df = 4, P > 0.09$    |
| Good's Coverage   | 0.9996±0.0001            | 0.9989±0.0004                    | $t = 1.67, df = 4, P = 0.17$    |
