# Supplementary material for: The invasive red-eared slider turtle is more successful than the native Chinese three-keeled pond turtle: evidence from the gut microbiota
Source: PubMed Central journal article supplement (PMC7603792; doi:10.7717/peerj.10271), 2020-10-29
Supplement: peerj-08-10271-s003.pdf [file peerj-08-10271-s003.pdf]

Table S3 Results of linear discriminatory analysis (LDA) on the relative abundance between *Chinemys reevesii* (CR) and *Trachemys scripta elegans* (TSE).

| Taxon                                                       | Group | LDA value | P value  |
|-------------------------------------------------------------|-------|-----------|----------|
| Firmicutes.Clostridia.Clostridiales.Lachnospiraceae         | CR    | 5.010648  | 0.049535 |
| Bacteroidetes.Bacteroidia.Bacteroidales.Porphyromonadaceae  | TSE   | 5.205142  | 0.049535 |
| Bacteroidetes                                               | TSE   | 5.154239  | 0.049535 |
| Firmicutes                                                  | CR    | 5.148316  | 0.049535 |
| Firmicutes.Clostridia                                       | CR    | 5.110004  | 0.049535 |
| Firmicutes.Clostridia.Clostridiales                         | CR    | 5.10834   | 0.049535 |
| Bacteroidetes.Bacteroidia.Bacteroidales                     | TSE   | 5.105383  | 0.049535 |
| Bacteroidetes.Bacteroidia                                   | TSE   | 5.058165  | 0.049535 |
| Bacteroidetes.Bacteroidia.Bacteroidales.Bacteroidaceae      | CR    | 5.044687  | 0.049535 |
| Fusobacteria.Fusobacteriia.Fusobacteriales                  | TSE   | 4.799418  | 0.046302 |
| Fusobacteria.Fusobacteriia                                  | TSE   | 4.778695  | 0.046302 |
| Fusobacteria.Fusobacteriia.Fusobacteriales.Fusobacteriaceae | TSE   | 4.764831  | 0.046302 |
| Fusobacteria                                                | TSE   | 4.750134  | 0.046302 |
| Firmicutes.Clostridia.Clostridiales.Clostridiaceae          | CR    | 4.455754  | 0.049535 |
