# Supplementary material for: The invasive red-eared slider turtle is more successful than the native Chinese three-keeled pond turtle: evidence from the gut microbiota
Source: PubMed Central journal article supplement (PMC7603792; doi:10.7717/peerj.10271), 2020-10-29

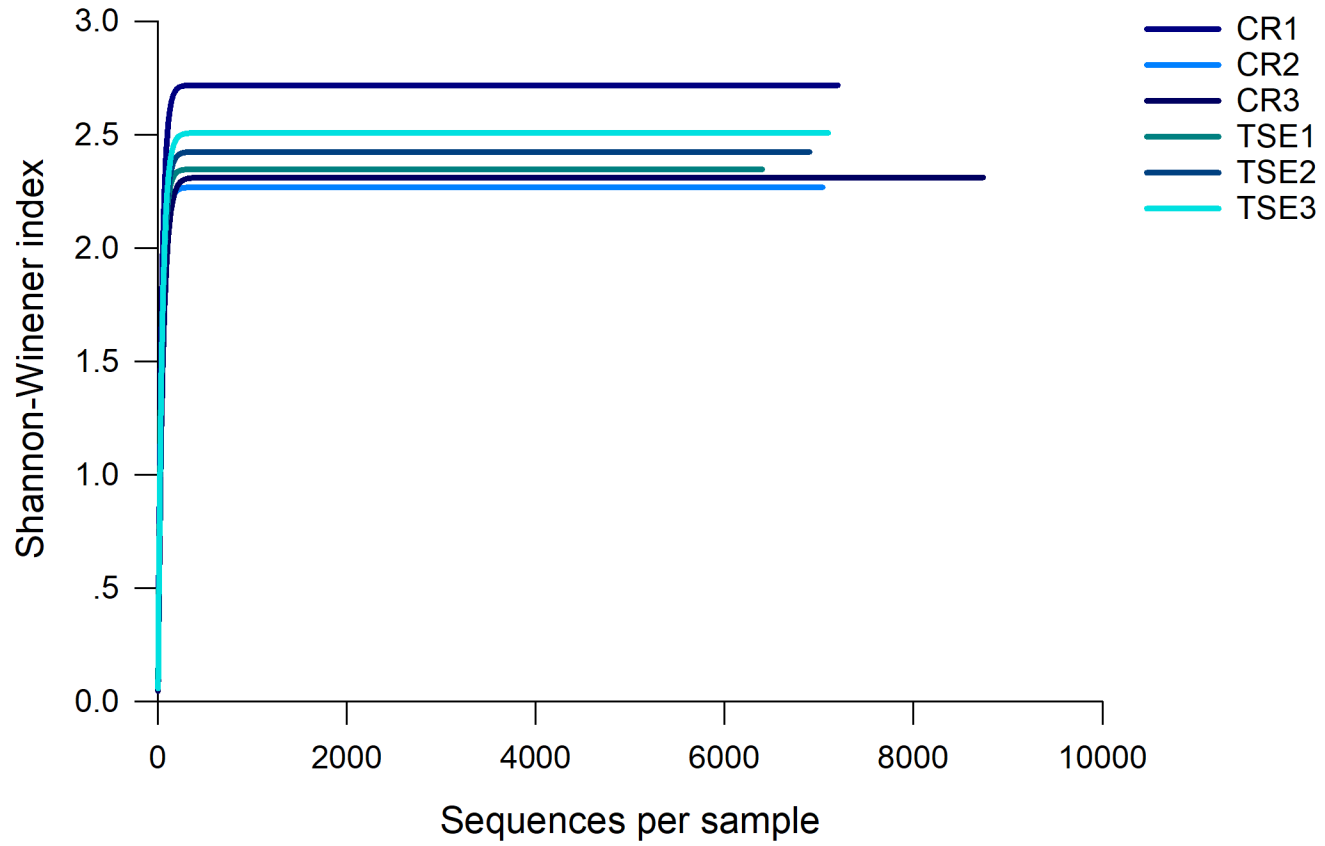

Supplement: peerj-08-10271-s005.pdf [file peerj-08-10271-s005.pdf]
